# Supplementary material for: Discovery and Validation of an Epithelial‐Mesenchymal Transition‐Based Signature in Gastric Cancer by Genomics and Prognosis Analysis
Source: Hindawi journal article supplement (doi:10.1155/2021/9026918), 2021-01-01
Supplement: f1 [file 9026918.f1.pdf]

Supplementary table 1. A list of EMT-related gene signatures.

ABI3BP  
ACTA2  
ADAM12  
ANPEP  
APLP1  
AREG  
BASP1  
BDNF  
BGN  
BMP1  
CADM1  
CALD1  
CALU  
CAP2  
CAPG  
CCN1  
CCN2  
CD44  
CD59  
CDH11  
CDH2  
CDH6  
COL11A1  
COL12A1  
COL16A1  
COL1A1  
COL1A2  
COL3A1  
COL4A1  
COL4A2  
COL5A1  
COL5A2  
COL5A3  
COL6A2  
COL6A3  
COL7A1  
COL8A2  
COLGALT1  
COMP  
COPA  
CRLF1  
CTHRC1  
CXCL1  
CXCL12  
CXCL6  
CXCL8  
DAB2  
DCN  
DKK1  
DPYSL3  
DST  
ECM1

ECM2  
EDIL3  
EFEMP2  
ELN  
EMP3  
ENO2  
FAP  
FAS  
FBLN1  
FBLN2  
FBLN5  
FBN1  
FBN2  
FERMT2  
FGF2  
FLNA  
FMOD  
FN1  
FOXC2  
FSTL1  
FSTL3  
FUCA1  
FZD8  
GADD45A  
GADD45B  
GAS1  
GEM  
GJA1  
GLIPR1  
GPC1  
GPX7  
GREM1  
HTRA1  
ID2  
IGFBP2  
IGFBP3  
IGFBP4  
IL15  
IL32  
IL6  
INHBA  
ITGA2  
ITGA5  
ITGAV  
ITGB1  
ITGB3  
ITGB5  
JUN  
LAMA1  
LAMA2  
LAMA3  
LAMC1  
LAMC2

LGALS1  
LOX  
LOXL1  
LOXL2  
LRP1  
LRRC15  
LUM  
MAGEE1  
MATN2  
MATN3  
MCM7  
MEST  
MFAP5  
MGP  
MMP1  
MMP14  
MMP2  
MMP3  
MSX1  
MXRA5  
MYL9  
MYLK  
NID2  
NNMT  
NOTCH2  
NT5E  
NTM  
OXTR  
P3H1  
PCOLCE  
PCOLCE2  
PDGFRB  
PDLIM4  
PFN2  
PLAUR  
PLOD1  
PLOD2  
PLOD3  
PMEPA1  
PMP22  
POSTN  
PIIB  
PRRX1  
PRSS2  
PTHLH  
PTX3  
PVR  
QSOX1  
RGS4  
RHOB  
SAT1  
SCG2  
SDC1
