# Supplementary material for: Discovery and Validation of an Epithelial‐Mesenchymal Transition‐Based Signature in Gastric Cancer by Genomics and Prognosis Analysis
Source: Hindawi journal article supplement (doi:10.1155/2021/9026918), 2021-01-01
Supplement: f2 [file 9026918.f2.pdf]

Supplementary table 2. Differentially expressed EMT-related genes in gastric cancer.

| ID        | logFC        | AveExpr     | t            | P.Value     |
|-----------|--------------|-------------|--------------|-------------|
| SFRP1     | -2.652162623 | 2.318211174 | -7.990776273 | 1.36E-14    |
| MYL9      | -1.940658479 | 7.593159793 | -5.786282575 | 1.43E-08    |
| ABI3BP    | -1.683510092 | 3.106029756 | -5.50130682  | 6.64E-08    |
| TAGLN     | -1.590284054 | 7.058879802 | -4.658722586 | 4.30E-06    |
| PCOLCE2   | -1.441558057 | 1.306697229 | -7.272295468 | 1.80E-12    |
| MYLK      | -1.370729835 | 5.121911294 | -3.998059087 | 7.57E-05    |
| FBLN1     | -1.322985744 | 6.378227853 | -3.934779915 | 9.77E-05    |
| TPM2      | -1.28067254  | 7.14913488  | -4.165063841 | 3.79E-05    |
| MFAP5     | -1.149028531 | 3.472472557 | -3.873129681 | 0.000124967 |
| CXCL12    | -1.13799746  | 4.289708005 | -4.552485434 | 6.99E-06    |
| DCN       | -1.095691723 | 6.265357461 | -4.314718514 | 2.00E-05    |
| ACTA2     | -1.086989152 | 8.202511084 | -3.674677716 | 0.000269652 |
| MSX1      | 1.052323717  | 2.697628438 | 5.809703015  | 1.25E-08    |
| TGFBI     | 1.070032993  | 6.180035781 | 4.704298159  | 3.48E-06    |
| FSTL3     | 1.110195996  | 4.451438229 | 4.565057456  | 6.60E-06    |
| WNT5A     | 1.133099201  | 3.379308559 | 5.571369953  | 4.58E-08    |
| LAMA3     | 1.185868368  | 4.224877242 | 4.517023425  | 8.20E-06    |
| COL4A2    | 1.200738837  | 7.364642493 | 5.863827669  | 9.30E-09    |
| LUM       | 1.217801995  | 7.833995158 | 4.854953498  | 1.71E-06    |
| CALU      | 1.219795504  | 6.459115329 | 8.949858092  | 1.23E-17    |
| LRRC15    | 1.24360677   | 2.070346181 | 4.901827342  | 1.37E-06    |
| VEGFA     | 1.24410416   | 4.683477065 | 6.933965498  | 1.59E-11    |
| PRRX1     | 1.249536696  | 3.594451479 | 4.895233537  | 1.41E-06    |
| COL5A3    | 1.265716745  | 3.194959203 | 6.775123919  | 4.32E-11    |
| NID2      | 1.295736081  | 3.727136252 | 6.265041489  | 9.41E-10    |
| P3H1      | 1.394693628  | 4.563415013 | 10.88000908  | 2.12E-24    |
| MMP14     | 1.410128369  | 7.05344789  | 7.781797792  | 5.84E-14    |
| PVR       | 1.435807303  | 5.406890134 | 8.911523599  | 1.65E-17    |
| DKK1      | 1.454605799  | 2.621650456 | 3.298793027  | 0.001055516 |
| COLGALT1  | 1.468984062  | 5.855791206 | 12.28507277  | 9.12E-30    |
| LOX       | 1.517777131  | 3.801500716 | 7.290973926  | 1.59E-12    |
| MATN3     | 1.521051895  | 2.074658627 | 6.559111994  | 1.63E-10    |
| CDH11     | 1.588355365  | 4.322004283 | 7.054776903  | 7.38E-12    |
| BMP1      | 1.592866018  | 4.498428231 | 11.20873179  | 1.26E-25    |
| COL7A1    | 1.621532739  | 2.737747649 | 6.707997398  | 6.54E-11    |
| MCM7      | 1.656855667  | 6.251084663 | 9.969957003  | 4.10E-21    |
| CXCL6     | 1.658417264  | 2.193241842 | 5.598857632  | 3.95E-08    |
| ITGA2     | 1.661690638  | 4.395281836 | 8.213287943  | 2.82E-15    |
| COL6A3    | 1.663161221  | 6.721663974 | 6.665794377  | 8.49E-11    |
| FN1       | 1.671889764  | 7.763071168 | 5.241563171  | 2.55E-07    |
| IGFBP3    | 1.718079399  | 7.236477412 | 7.895760114  | 2.65E-14    |
| PDGFRB    | 1.725331353  | 5.735592941 | 8.114282912  | 5.70E-15    |
| PLAUR     | 1.729771509  | 6.361942567 | 8.521863584  | 3.01E-16    |
| IL32      | 1.731357779  | 7.464222364 | 7.701213161  | 1.02E-13    |
| LOXL2     | 1.755429361  | 5.108185737 | 9.753014667  | 2.36E-20    |
| TNFRSF12A | 1.763406907  | 5.985473256 | 8.954590261  | 1.19E-17    |
| TNFRSF11B | 1.8018337    | 2.617577283 | 6.320386876  | 6.80E-10    |
| PLOD3     | 1.824040402  | 6.457899655 | 11.63038193  | 3.16E-27    |
| COL5A1    | 1.844667996  | 6.107576905 | 7.579537561  | 2.32E-13    |
| SPARC     | 1.844930061  | 8.670151996 | 8.605107096  | 1.63E-16    |
| SERPINH1  | 1.874926377  | 6.824129316 | 12.04382184  | 8.01E-29    |

|          |             |             |             |          |
|----------|-------------|-------------|-------------|----------|
| VCAN     | 1.904105896 | 4.664317193 | 8.022767002 | 1.09E-14 |
| MXRA5    | 1.914134996 | 5.381795753 | 7.906794421 | 2.45E-14 |
| TIMP1    | 1.920030977 | 9.733531782 | 10.09686638 | 1.46E-21 |
| COMP     | 1.928020819 | 2.578235496 | 5.370298455 | 1.32E-07 |
| COL12A1  | 1.944376055 | 5.207415338 | 7.840642452 | 3.89E-14 |
| ADAM12   | 1.986204817 | 2.213550067 | 8.835955221 | 2.92E-17 |
| COL4A1   | 2.066698804 | 7.23463561  | 10.54054765 | 3.72E-23 |
| THY1     | 2.067709718 | 5.763789825 | 9.571158534 | 1.00E-19 |
| COL11A1  | 2.09821453  | 2.067897624 | 6.904573549 | 1.92E-11 |
| PMEPA1   | 2.183523293 | 5.765772846 | 8.938580344 | 1.34E-17 |
| SERPINE1 | 2.231793543 | 5.347155914 | 8.126500214 | 5.23E-15 |
| COL5A2   | 2.239970974 | 5.620654951 | 10.09593044 | 1.47E-21 |
| COL1A2   | 2.24114661  | 8.822003903 | 8.631379729 | 1.34E-16 |
| FAP      | 2.258127381 | 3.068210083 | 9.345996763 | 5.87E-19 |
| COL3A1   | 2.414574974 | 9.03327536  | 9.0697223   | 4.95E-18 |
| MEST     | 2.466178497 | 5.172575314 | 12.13758179 | 3.45E-29 |
| THBS2    | 2.521529225 | 5.100308915 | 8.002397044 | 1.26E-14 |
| LAMC2    | 2.550186622 | 5.733617838 | 9.565690218 | 1.05E-19 |
| MMP3     | 2.64555183  | 3.233279822 | 6.309857313 | 7.23E-10 |
| SFRP4    | 2.784801196 | 4.590632111 | 6.63900623  | 1.00E-10 |
| MMP1     | 2.84672022  | 5.605500409 | 7.107359365 | 5.26E-12 |
| BGN      | 2.875285943 | 8.237813831 | 11.70875992 | 1.58E-27 |
| CXCL8    | 2.971896465 | 5.479010059 | 7.981220915 | 1.46E-14 |
| INHBA    | 3.023284501 | 3.898639917 | 12.55959716 | 7.52E-31 |
| CXCL1    | 3.16376669  | 5.979897119 | 9.09669111  | 4.03E-18 |
| COL1A1   | 3.282726757 | 9.525545655 | 11.85423758 | 4.35E-28 |
| CTHRC1   | 3.364768706 | 5.355515357 | 12.82631595 | 6.51E-32 |
| SPP1     | 3.413890902 | 6.105015229 | 8.827519775 | 3.11E-17 |

| adj.P.Val   | B            |
|-------------|--------------|
| 7.58E-14    | 22.48710794  |
| 4.39E-08    | 8.992732188  |
| 1.92E-07    | 7.509413144  |
| 1.00E-05    | 3.508077558  |
| 7.82E-12    | 17.717778    |
| 0.000152933 | 0.79016224   |
| 0.000189792 | 0.549858529  |
| 8.16E-05    | 1.44134247   |
| 0.000240321 | 0.319159895  |
| 1.57E-05    | 3.04561217   |
| 4.40E-05    | 2.04563368   |
| 0.000494774 | -0.400403855 |
| 3.92E-08    | 9.117472176  |
| 8.20E-06    | 3.709414422  |
| 1.50E-05    | 3.099838049  |
| 1.35E-07    | 7.868148177  |
| 1.82E-05    | 2.89338509   |
| 2.95E-08    | 9.407377288  |
| 4.23E-06    | 4.387432567  |
| 1.12E-16    | 29.3528702   |
| 3.51E-06    | 4.602271807  |
| 6.37E-11    | 15.59147348  |
| 3.58E-06    | 4.571939132  |
| 1.66E-10    | 14.6207378   |
| 3.08E-09    | 11.62640769  |
| 4.23E-23    | 44.66079405  |
| 2.78E-13    | 21.06536187  |
| 1.37E-16    | 29.06818546  |
| 0.001773977 | -1.66578684  |
| 6.08E-28    | 56.82365379  |
| 7.07E-12    | 17.83745155  |
| 5.71E-10    | 13.32952078  |
| 3.07E-11    | 16.34166032  |
| 2.80E-24    | 47.43837229  |
| 2.42E-10    | 14.21589334  |
| 5.86E-20    | 37.21680036  |
| 1.18E-07    | 8.009954411  |
| 1.88E-14    | 24.03098305  |
| 3.09E-10    | 13.96301769  |
| 6.89E-07    | 6.213818844  |
| 1.36E-13    | 21.83725206  |
| 3.57E-14    | 23.34026702  |
| 2.07E-15    | 26.22185687  |
| 4.72E-13    | 20.52456767  |
| 3.14E-19    | 35.49960268  |
| 1.12E-16    | 29.38806976  |
| 2.30E-09    | 11.94205456  |
| 7.91E-26    | 51.06419653  |
| 1.06E-12    | 19.71599306  |
| 1.16E-15    | 26.8225637   |
| 3.20E-27    | 54.68384696  |

|          |             |
|----------|-------------|
| 6.60E-14 | 22.70718189 |
| 1.29E-13 | 21.91242812 |
| 2.26E-20 | 38.23197516 |
| 3.66E-07 | 6.849151312 |
| 1.94E-13 | 21.46289526 |
| 2.33E-16 | 28.50940435 |
| 6.76E-22 | 41.84042215 |
| 1.23E-18 | 34.07823998 |
| 7.52E-11 | 15.4105061  |
| 1.17E-16 | 29.26903265 |
| 3.37E-14 | 23.42517594 |
| 2.26E-20 | 38.22446011 |
| 9.94E-16 | 27.01299346 |
| 6.52E-18 | 32.34196682 |
| 4.95E-17 | 30.24828887 |
| 1.73E-27 | 55.5131145  |
| 7.40E-14 | 22.56697673 |
| 1.23E-18 | 34.03576105 |
| 2.41E-09 | 11.88182629 |
| 3.57E-10 | 13.80317141 |
| 2.24E-11 | 16.67134184 |
| 4.52E-26 | 51.74563335 |
| 7.89E-14 | 22.42149798 |
| 7.52E-29 | 59.28201584 |
| 4.24E-17 | 30.45084446 |
| 1.45E-26 | 53.0164182  |
| 1.30E-29 | 61.69321895 |
| 2.39E-16 | 28.44722933 |
