# Supplementary material for: Discovery and Validation of an Epithelial‐Mesenchymal Transition‐Based Signature in Gastric Cancer by Genomics and Prognosis Analysis
Source: Hindawi journal article supplement (doi:10.1155/2021/9026918), 2021-01-01
Supplement: f3 [file 9026918.f3.pdf]

Supplementary table 3. Differentially expressed genes between high-and low-RS groups.

| ID       | logFC       | AveExpr     | t           | P.Value  |
|----------|-------------|-------------|-------------|----------|
| SERPINE1 | 1.952945344 | 5.518095995 | 15.64822406 | 3.37E-42 |
| MATN3    | 1.66816317  | 2.191825928 | 15.55899625 | 7.67E-42 |
| LTBP2    | 1.379651281 | 4.700641549 | 12.11691882 | 1.89E-28 |
| MFGE8    | 1.013651785 | 6.434078342 | 12.00446216 | 4.96E-28 |
| VASN     | 1.065761817 | 4.141726997 | 11.8762766  | 1.48E-27 |
| GLIS2    | 1.112984759 | 3.677506312 | 11.58556593 | 1.74E-26 |
| LBH      | 1.046492684 | 5.305962947 | 11.51828006 | 3.07E-26 |
| VCAN     | 1.36641312  | 4.783115002 | 11.47538198 | 4.40E-26 |
| THBS1    | 1.464224917 | 6.412305072 | 11.44172366 | 5.84E-26 |
| CCN2     | 1.246789117 | 7.302180429 | 11.34366829 | 1.33E-25 |
| KIRREL1  | 1.042127868 | 3.758421694 | 11.31376031 | 1.70E-25 |
| CERCAM   | 1.210771161 | 4.080055131 | 11.27771409 | 2.30E-25 |
| TIMP2    | 1.182593998 | 7.199037899 | 11.16008541 | 6.11E-25 |
| LRRC32   | 1.175962608 | 4.624085381 | 10.86320618 | 7.06E-24 |
| SCARF2   | 1.254921717 | 3.872866524 | 10.85490163 | 7.55E-24 |
| CMTM3    | 1.00912778  | 4.472513472 | 10.84966644 | 7.88E-24 |
| CCN1     | 1.343678288 | 6.114272411 | 10.68024818 | 3.14E-23 |
| EFEMP2   | 1.092013649 | 4.886607499 | 10.64320612 | 4.24E-23 |
| ANTXR1   | 1.311441553 | 5.509314867 | 10.57037857 | 7.64E-23 |
| MFAP2    | 1.377750765 | 3.982257054 | 10.56692943 | 7.85E-23 |
| AEBP1    | 1.404772894 | 6.919584612 | 10.5496694  | 9.03E-23 |
| MXRA8    | 1.381065188 | 5.969632574 | 10.52528101 | 1.10E-22 |
| PDGFRB   | 1.133023678 | 5.868292145 | 10.47899355 | 1.60E-22 |
| ITGA11   | 1.205425679 | 3.008706731 | 10.43585075 | 2.26E-22 |
| BGN      | 1.316131688 | 8.472832125 | 10.35222448 | 4.41E-22 |
| AXL      | 1.064314763 | 4.622861126 | 10.31901371 | 5.75E-22 |
| GFPT2    | 1.17494685  | 2.70704427  | 10.30493339 | 6.43E-22 |
| SPARC    | 1.124180139 | 8.789140904 | 10.25532293 | 9.55E-22 |
| COL8A2   | 1.106353739 | 2.609423964 | 10.18625234 | 1.65E-21 |
| GXYLT2   | 1.174063408 | 2.400290168 | 10.11822542 | 2.83E-21 |
| CLDN11   | 1.134053066 | 1.934530103 | 10.11742435 | 2.85E-21 |
| FSTL1    | 1.077730233 | 6.363177181 | 10.10776413 | 3.07E-21 |
| COL8A1   | 1.541780772 | 4.232220101 | 10.06859473 | 4.19E-21 |
| HEYL     | 1.140356136 | 3.906564474 | 10.06129801 | 4.43E-21 |
| INHBA    | 1.258197721 | 4.129517301 | 10.01323628 | 6.47E-21 |
| LOXL1    | 1.011464957 | 4.792208581 | 9.972760843 | 8.89E-21 |
| MMP2     | 1.316854044 | 7.124544008 | 9.907791125 | 1.48E-20 |
| FBN1     | 1.263656468 | 4.422429826 | 9.900915979 | 1.56E-20 |
| GGT5     | 1.079220677 | 4.279175    | 9.858843697 | 2.17E-20 |
| CDH11    | 1.144137059 | 4.423796399 | 9.855298477 | 2.23E-20 |
| FN1      | 1.568761281 | 7.873318125 | 9.815592052 | 3.03E-20 |
| LTBP3    | 1.025120419 | 5.716205827 | 9.809059152 | 3.19E-20 |
| ADGRA2   | 1.066524398 | 4.333999452 | 9.774169676 | 4.18E-20 |
| OLFML2B  | 1.276657737 | 4.514925902 | 9.758740292 | 4.71E-20 |
| MYH10    | 1.087271065 | 3.69152503  | 9.740115076 | 5.44E-20 |
| NTM      | 1.055384589 | 2.293348832 | 9.733847756 | 5.72E-20 |
| FNDC1    | 1.707013241 | 3.752949876 | 9.722195721 | 6.25E-20 |
| CLEC11A  | 1.03692815  | 3.991539144 | 9.687598769 | 8.17E-20 |
| CRISPLD2 | 1.043617444 | 5.076586784 | 9.645499838 | 1.13E-19 |

|          |             |             |             |          |
|----------|-------------|-------------|-------------|----------|
| BICC1    | 1.043034572 | 2.716726317 | 9.643392795 | 1.15E-19 |
| EFEMP1   | 1.457379259 | 4.986494027 | 9.639792176 | 1.18E-19 |
| CHST3    | 1.018248481 | 2.714959976 | 9.625651598 | 1.32E-19 |
| MEDAG    | 1.191799464 | 2.722690091 | 9.59823745  | 1.63E-19 |
| FAP      | 1.224836048 | 3.213650048 | 9.588666693 | 1.75E-19 |
| THBS2    | 1.597600527 | 5.277038658 | 9.575382073 | 1.94E-19 |
| MRC2     | 1.070323925 | 4.731954403 | 9.571995884 | 1.99E-19 |
| TWIST1   | 1.054048827 | 2.270943708 | 9.548390012 | 2.38E-19 |
| DEPP1    | 1.169975209 | 5.960247767 | 9.529722301 | 2.75E-19 |
| SERPINF1 | 1.237881316 | 6.398117635 | 9.495025402 | 3.58E-19 |
| COL5A2   | 1.091440243 | 5.778481407 | 9.472573864 | 4.25E-19 |
| C1S      | 1.161023357 | 7.017838488 | 9.455861965 | 4.82E-19 |
| PER1     | 1.012410178 | 4.491836833 | 9.444280511 | 5.27E-19 |
| CTHRC1   | 1.322235086 | 5.603125499 | 9.443741544 | 5.29E-19 |
| SLC2A3   | 1.029557974 | 4.088182925 | 9.400892977 | 7.33E-19 |
| TIMP3    | 1.177063278 | 2.980585651 | 9.368989233 | 9.33E-19 |
| ITGBL1   | 1.245581005 | 2.021177321 | 9.359278583 | 1.00E-18 |
| FBLN2    | 1.393529688 | 4.407677303 | 9.334088128 | 1.21E-18 |
| PTGIS    | 1.636892063 | 3.183092099 | 9.32299615  | 1.32E-18 |
| C1R      | 1.085729598 | 6.594610471 | 9.300698684 | 1.56E-18 |
| EVC      | 1.018693658 | 2.605979588 | 9.287557306 | 1.73E-18 |
| COL5A1   | 1.171544292 | 6.254064853 | 9.279013247 | 1.84E-18 |
| NNMT     | 1.142830502 | 5.487407063 | 9.254064181 | 2.22E-18 |
| GEM      | 1.07265611  | 5.077248272 | 9.248712058 | 2.31E-18 |
| CPXM1    | 1.160001847 | 3.591269144 | 9.216950883 | 2.93E-18 |
| LOX      | 1.016532682 | 3.897018987 | 9.204034314 | 3.23E-18 |
| SERPING1 | 1.144385624 | 7.752067411 | 9.157711821 | 4.57E-18 |
| EHD2     | 1.016415367 | 6.178315717 | 9.146821244 | 4.96E-18 |
| IGFBP3   | 1.045427424 | 7.347734881 | 9.13188852  | 5.54E-18 |
| SULF1    | 1.428587613 | 5.874630554 | 9.089868771 | 7.58E-18 |
| FGFR1    | 1.113527238 | 4.020435406 | 9.030509054 | 1.18E-17 |
| ADAMTS2  | 1.193988563 | 4.177460027 | 8.988606537 | 1.61E-17 |
| PODN     | 1.405941897 | 4.582293592 | 8.987400096 | 1.62E-17 |
| FSTL3    | 1.154736429 | 4.576549803 | 8.986613005 | 1.63E-17 |
| COL3A1   | 1.264683045 | 9.206853803 | 8.982765249 | 1.68E-17 |
| C11orf96 | 1.11384038  | 5.750786891 | 8.973768375 | 1.79E-17 |
| ELN      | 1.397021148 | 4.833953191 | 8.959468835 | 1.99E-17 |
| CAVIN1   | 1.048866817 | 6.396361072 | 8.937421164 | 2.34E-17 |
| COL1A2   | 1.231245657 | 8.986731325 | 8.926347088 | 2.54E-17 |
| FBXO17   | 1.095843841 | 2.44716811  | 8.907817571 | 2.91E-17 |
| CILP2    | 1.035031184 | 1.38188627  | 8.880151876 | 3.57E-17 |
| PCOLCE   | 1.003759058 | 5.887806547 | 8.873447455 | 3.75E-17 |
| LAMA2    | 1.002235228 | 2.35910777  | 8.837168188 | 4.89E-17 |
| IGFBP6   | 1.035978462 | 4.544528943 | 8.82969552  | 5.16E-17 |
| FSCN1    | 1.068477486 | 5.90101018  | 8.793317922 | 6.73E-17 |
| DACT1    | 1.012413455 | 3.127454291 | 8.776568559 | 7.60E-17 |
| RAB34    | 1.070488406 | 5.226312395 | 8.734076451 | 1.04E-16 |
| SPOCK1   | 1.420313391 | 3.245952124 | 8.729293002 | 1.07E-16 |
| MOXD1    | 1.142540502 | 3.220525494 | 8.716049751 | 1.18E-16 |
| PALM     | 1.170818424 | 3.434228017 | 8.71399663  | 1.20E-16 |
| TMEM119  | 1.101016043 | 4.008553167 | 8.674410002 | 1.60E-16 |
| CTSF     | 1.074738531 | 4.146078834 | 8.668431005 | 1.67E-16 |
| ISLR     | 1.417379711 | 5.683641471 | 8.653020582 | 1.86E-16 |

|          |             |             |             |          |
|----------|-------------|-------------|-------------|----------|
| FBLN5    | 1.083293277 | 4.993429141 | 8.635363061 | 2.11E-16 |
| HTRA3    | 1.130468808 | 5.334290751 | 8.610553334 | 2.53E-16 |
| COL6A2   | 1.023531557 | 8.205715124 | 8.580988146 | 3.13E-16 |
| LUM      | 1.117576143 | 7.895870225 | 8.557041628 | 3.71E-16 |
| COL6A3   | 1.10574805  | 6.846166773 | 8.538846434 | 4.23E-16 |
| FBLN1    | 1.550581646 | 6.259287217 | 8.482974546 | 6.31E-16 |
| PLXDC2   | 1.000547939 | 3.453166242 | 8.482749083 | 6.32E-16 |
| SFRP4    | 1.941019111 | 4.790825657 | 8.438798928 | 8.64E-16 |
| SLC22A17 | 1.009185094 | 2.925349319 | 8.366086401 | 1.45E-15 |
| COL1A1   | 1.246760324 | 9.794186941 | 8.341904787 | 1.71E-15 |
| COL10A1  | 1.6933778   | 3.700516531 | 8.332791832 | 1.83E-15 |
| COL12A1  | 1.074579248 | 5.348234446 | 8.306531023 | 2.20E-15 |
| FKBP10   | 1.193219817 | 5.78291969  | 8.303096087 | 2.25E-15 |
| MFAP5    | 1.309477395 | 3.357596503 | 8.293515908 | 2.41E-15 |
| COMP     | 1.639080851 | 2.734713575 | 8.28871949  | 2.49E-15 |
| DUSP1    | 1.011059703 | 7.336030662 | 8.26318603  | 2.98E-15 |
| GPX3     | 1.062678655 | 5.705176353 | 8.251325518 | 3.24E-15 |
| AKAP12   | 1.200934129 | 3.420065463 | 8.249766764 | 3.28E-15 |
| ANGPTL2  | 1.032894511 | 5.219647542 | 8.239731038 | 3.51E-15 |
| EMILIN1  | 1.06181472  | 5.702155739 | 8.231606137 | 3.72E-15 |
| ROR2     | 1.082410459 | 2.735626043 | 8.196328028 | 4.76E-15 |
| GAS1     | 1.268121744 | 2.951292276 | 8.189894862 | 4.98E-15 |
| UCHL1    | 1.276508498 | 2.981128976 | 8.157714436 | 6.23E-15 |
| CPE      | 1.156079439 | 4.128956873 | 8.069693861 | 1.15E-14 |
| DCN      | 1.093346742 | 6.155547029 | 8.049976255 | 1.31E-14 |
| DPYSL3   | 1.288956427 | 5.398598033 | 8.037410191 | 1.43E-14 |
| GREM1    | 1.479447547 | 4.784621837 | 7.970793776 | 2.26E-14 |
| SERPINE2 | 1.000548155 | 3.525156281 | 7.920313588 | 3.19E-14 |
| CYBRD1   | 1.084926777 | 5.104531537 | 7.901648418 | 3.63E-14 |
| SLIT2    | 1.021982424 | 1.92401033  | 7.866783298 | 4.60E-14 |
| BCAM     | 1.023862957 | 5.501900114 | 7.856561772 | 4.93E-14 |
| LDOC1    | 1.01365692  | 3.680750165 | 7.75731744  | 9.63E-14 |
| FMOD     | 1.014290188 | 5.722314503 | 7.682959207 | 1.58E-13 |
| MN1      | 1.027121555 | 2.473423452 | 7.637969324 | 2.14E-13 |
| FOSB     | 1.374615793 | 4.31685137  | 7.532657602 | 4.30E-13 |
| PRRX1    | 1.038861242 | 3.685587429 | 7.470508444 | 6.46E-13 |
| MGP      | 1.355270627 | 7.403526079 | 7.468960758 | 6.53E-13 |
| OBSL1    | 1.021217079 | 3.208340768 | 7.452011371 | 7.29E-13 |
| SFRP2    | 1.961905961 | 5.660198841 | 7.419684501 | 9.01E-13 |
| CYP1B1   | 1.259437854 | 3.017956455 | 7.398934562 | 1.03E-12 |
| PRELP    | 1.419431752 | 3.558711816 | 7.292067499 | 2.06E-12 |
| MMP11    | 1.312043723 | 4.857653806 | 7.285075614 | 2.16E-12 |
| CCDC80   | 1.259130842 | 3.898833975 | 7.279934078 | 2.23E-12 |
| COL14A1  | 1.175495154 | 3.969119213 | 7.260941646 | 2.52E-12 |
| POSTN    | 1.053869856 | 6.805252688 | 7.172996955 | 4.42E-12 |
| BOC      | 1.058931657 | 2.56505817  | 7.147591385 | 5.19E-12 |
| SPON1    | 1.273058833 | 4.291237744 | 7.067436184 | 8.62E-12 |
| CST2     | 1.163898247 | 2.672753201 | 6.998013999 | 1.33E-11 |
| PDLIM3   | 1.10803903  | 4.435114494 | 6.965418629 | 1.63E-11 |
| TNS1     | 1.12818154  | 5.456201115 | 6.959135254 | 1.70E-11 |
| MSRB3    | 1.025784547 | 3.721893751 | 6.923853213 | 2.12E-11 |
| AOC3     | 1.09310951  | 4.09263272  | 6.843114354 | 3.49E-11 |
| SSC5D    | 1.029047591 | 3.208594773 | 6.809778383 | 4.28E-11 |

|           |              |             |              |             |
|-----------|--------------|-------------|--------------|-------------|
| F13A1     | 1.125358414  | 2.791045234 | 6.800784773  | 4.52E-11    |
| DKK1      | 1.663842824  | 2.765366605 | 6.676499962  | 9.64E-11    |
| FLNA      | 1.050837078  | 8.166525103 | 6.590434953  | 1.62E-10    |
| PCDH7     | 1.019165727  | 3.623831161 | 6.584319434  | 1.68E-10    |
| LRRN1     | 1.012527273  | 1.615026195 | 6.580352598  | 1.72E-10    |
| CRYAB     | 1.070624962  | 4.592980592 | 6.520318687  | 2.46E-10    |
| ACTA2     | 1.037833876  | 8.118292007 | 6.49089439   | 2.93E-10    |
| MFAP4     | 1.183895475  | 6.385369243 | 6.486554943  | 3.00E-10    |
| TAGLN     | 1.206193358  | 6.953168989 | 6.438268541  | 4.00E-10    |
| THBS4     | 1.56781865   | 3.453146863 | 6.39162784   | 5.25E-10    |
| RSPO3     | 1.017320061  | 2.860223229 | 6.390095739  | 5.30E-10    |
| SMOC2     | 1.152306675  | 4.759885465 | 6.328847468  | 7.58E-10    |
| MYL9      | 1.142869715  | 7.466252858 | 6.313474412  | 8.29E-10    |
| COL11A1   | 1.089382405  | 2.215450195 | 6.285341409  | 9.75E-10    |
| SERPINA5  | 1.017858356  | 2.218904156 | 6.260208292  | 1.13E-09    |
| CHRD1     | 1.091132402  | 1.981854866 | 6.256853289  | 1.15E-09    |
| C3        | 1.150617111  | 7.431804069 | 6.23650742   | 1.29E-09    |
| APOD      | 1.513691915  | 5.9231248   | 6.13802445   | 2.27E-09    |
| ASPN      | 1.029651838  | 5.020334855 | 6.081130687  | 3.13E-09    |
| VSTM2L    | 1.021988785  | 2.000586918 | 6.024579501  | 4.30E-09    |
| CPXM2     | 1.014033806  | 3.361564053 | 5.958345895  | 6.22E-09    |
| L1CAM     | 1.069995363  | 2.306854219 | 5.90076081   | 8.56E-09    |
| RBPM2     | 1.007684457  | 3.164061254 | 5.797244097  | 1.51E-08    |
| HPN       | 1.082108396  | 1.823265884 | 5.756705483  | 1.88E-08    |
| HSPB8     | 1.034890387  | 3.953075273 | 5.729223946  | 2.18E-08    |
| PEG10     | 1.125893234  | 2.320609697 | 5.612194497  | 4.07E-08    |
| HSPB7     | 1.210491357  | 3.085560294 | 5.576911694  | 4.91E-08    |
| LINC02381 | 1.001800798  | 4.115474117 | 5.570083515  | 5.09E-08    |
| MYLK      | 1.042477948  | 5.026923597 | 5.54300291   | 5.87E-08    |
| CLDN6     | 1.165408122  | 1.170847562 | 5.535935173  | 6.09E-08    |
| SFRP1     | 1.022826286  | 2.107786122 | 5.418330084  | 1.12E-07    |
| CHRD2     | 1.211149335  | 4.064723373 | 5.326344588  | 1.80E-07    |
| H19       | 1.271854602  | 4.445490922 | 5.266482168  | 2.44E-07    |
| GPC3      | 1.091054961  | 3.243023567 | 5.192296113  | 3.53E-07    |
| CRABP2    | 1.037674833  | 4.086104569 | 5.074941174  | 6.31E-07    |
| BARX1     | 1.022293355  | 4.253273091 | 5.06680471   | 6.57E-07    |
| PLN       | 1.001722816  | 3.201799772 | 4.944710041  | 1.19E-06    |
| CST1      | 1.296884973  | 5.95418184  | 4.942472415  | 1.20E-06    |
| LMOD1     | 1.052078127  | 4.066236412 | 4.901183335  | 1.46E-06    |
| EEF1A2    | 1.076182469  | 2.092542697 | 4.789198257  | 2.48E-06    |
| HSPB6     | 1.276970699  | 5.230726301 | 4.734441486  | 3.20E-06    |
| IGF2      | 1.082413175  | 4.715993293 | 4.691118995  | 3.91E-06    |
| AGR3      | -1.076017932 | 6.200874979 | -4.673203286 | 4.24E-06    |
| FLNC      | 1.056049564  | 3.976301158 | 4.590822618  | 6.17E-06    |
| CNN1      | 1.190914553  | 5.813863091 | 4.48878079   | 9.74E-06    |
| C7        | 1.082546202  | 3.080627379 | 4.472177179  | 1.05E-05    |
| GPA33     | -1.035104567 | 3.503869769 | -4.464028891 | 1.09E-05    |
| OGN       | 1.012138524  | 3.005299523 | 4.371814469  | 1.63E-05    |
| SYNPO2    | 1.021062426  | 4.061951786 | 4.161321539  | 3.99E-05    |
| MYH11     | 1.190138852  | 6.453841163 | 4.056921169  | 6.14E-05    |
| PCSK1N    | 1.115806688  | 3.67290658  | 3.93609965   | 1.00E-04    |
| PHGR1     | -1.19371951  | 6.043650057 | -3.748614153 | 0.000208025 |
| DES       | 1.226301296  | 6.328971618 | 3.409686917  | 0.000726435 |

PGC

1.187609259

6.980637751

2.688111885

0.007529886

| adj.P.Val | B           |
|-----------|-------------|
| 1.86E-37  | 84.62681768 |
| 2.12E-37  | 83.82305601 |
| 3.48E-24  | 53.71017331 |
| 6.84E-24  | 52.76847167 |
| 1.64E-23  | 51.69940764 |
| 1.60E-22  | 49.2927504  |
| 2.42E-22  | 48.73938169 |
| 3.04E-22  | 48.38732035 |
| 3.58E-22  | 48.11149586 |
| 7.32E-22  | 47.31001171 |
| 8.54E-22  | 47.06616857 |
| 1.06E-21  | 46.77266824 |
| 2.59E-21  | 45.81788745 |
| 2.16E-20  | 43.42913755 |
| 2.17E-20  | 43.36276194 |
| 2.17E-20  | 43.32093145 |
| 8.24E-20  | 41.97259549 |
| 1.06E-19  | 41.67919543 |
| 1.60E-19  | 41.10384312 |
| 1.60E-19  | 41.0766437  |
| 1.78E-19  | 40.94060139 |
| 2.09E-19  | 40.74856651 |
| 2.84E-19  | 40.38472207 |
| 3.66E-19  | 40.04633772 |
| 6.57E-19  | 39.39248622 |
| 8.13E-19  | 39.13358107 |
| 8.87E-19  | 39.0239451  |
| 1.17E-18  | 38.63828314 |
| 1.94E-18  | 38.10298506 |
| 3.08E-18  | 37.57766595 |
| 3.08E-18  | 37.57149113 |
| 3.26E-18  | 37.49704937 |
| 4.20E-18  | 37.19560341 |
| 4.37E-18  | 37.13951826 |
| 6.05E-18  | 36.77065146 |
| 8.18E-18  | 36.460757   |
| 1.34E-17  | 35.96476963 |
| 1.39E-17  | 35.91238866 |
| 1.81E-17  | 35.59228442 |
| 1.83E-17  | 35.56534548 |
| 2.38E-17  | 35.26399937 |
| 2.41E-17  | 35.21448409 |
| 3.08E-17  | 34.95035717 |
| 3.42E-17  | 34.83371964 |
| 3.85E-17  | 34.69306194 |
| 3.99E-17  | 34.64576527 |
| 4.21E-17  | 34.55787835 |
| 5.24E-17  | 34.29727862 |
| 7.17E-17  | 33.98088454 |

|          |             |
|----------|-------------|
| 7.20E-17 | 33.96506977 |
| 7.32E-17 | 33.93804928 |
| 8.07E-17 | 33.83198864 |
| 9.75E-17 | 33.62662491 |
| 1.04E-16 | 33.55500818 |
| 1.12E-16 | 33.45566935 |
| 1.12E-16 | 33.43036104 |
| 1.31E-16 | 33.25407495 |
| 1.50E-16 | 33.11484497 |
| 1.90E-16 | 32.85648452 |
| 2.19E-16 | 32.68959823 |
| 2.44E-16 | 32.56552558 |
| 2.63E-16 | 32.47961767 |
| 2.63E-16 | 32.47562127 |
| 3.55E-16 | 32.15833113 |
| 4.44E-16 | 31.92263888 |
| 4.70E-16 | 31.85099447 |
| 5.41E-16 | 31.66534655 |
| 5.83E-16 | 31.58369541 |
| 6.74E-16 | 31.41973239 |
| 7.27E-16 | 31.32320772 |
| 7.69E-16 | 31.26049452 |
| 9.09E-16 | 31.07756662 |
| 9.24E-16 | 31.038363   |
| 1.13E-15 | 30.80599684 |
| 1.23E-15 | 30.71163626 |
| 1.63E-15 | 30.37388992 |
| 1.71E-15 | 30.29463444 |
| 1.90E-15 | 30.18605561 |
| 2.50E-15 | 29.8811014  |
| 3.76E-15 | 29.45177099 |
| 4.92E-15 | 29.14974514 |
| 4.94E-15 | 29.14106217 |
| 4.94E-15 | 29.13539773 |
| 5.05E-15 | 29.10771106 |
| 5.37E-15 | 29.04300233 |
| 5.84E-15 | 28.94023759 |
| 6.80E-15 | 28.78198953 |
| 7.30E-15 | 28.70259632 |
| 8.28E-15 | 28.56989    |
| 9.74E-15 | 28.37207169 |
| 1.02E-14 | 28.3241909  |
| 1.27E-14 | 28.06548951 |
| 1.32E-14 | 28.01228583 |
| 1.64E-14 | 27.75369067 |
| 1.81E-14 | 27.63485211 |
| 2.37E-14 | 27.3340101  |
| 2.43E-14 | 27.30020157 |
| 2.64E-14 | 27.2066622  |
| 2.67E-14 | 27.19216875 |
| 3.45E-14 | 26.91314362 |
| 3.58E-14 | 26.87107142 |
| 3.92E-14 | 26.76271909 |

|          |             |
|----------|-------------|
| 4.40E-14 | 26.63871918 |
| 5.21E-14 | 26.46476799 |
| 6.32E-14 | 26.25789554 |
| 7.34E-14 | 26.09067489 |
| 8.28E-14 | 25.96381863 |
| 1.17E-13 | 25.57537932 |
| 1.17E-13 | 25.5738152  |
| 1.51E-13 | 25.26943516 |
| 2.42E-13 | 24.76814092 |
| 2.81E-13 | 24.6020627  |
| 2.97E-13 | 24.53955793 |
| 3.49E-13 | 24.35969143 |
| 3.54E-13 | 24.33619264 |
| 3.77E-13 | 24.27068768 |
| 3.84E-13 | 24.23791083 |
| 4.57E-13 | 24.06363791 |
| 4.91E-13 | 23.98280871 |
| 4.95E-13 | 23.97219159 |
| 5.26E-13 | 23.90386755 |
| 5.50E-13 | 23.84859332 |
| 6.91E-13 | 23.60901826 |
| 7.21E-13 | 23.56540487 |
| 8.72E-13 | 23.34758522 |
| 1.50E-12 | 22.75476566 |
| 1.70E-12 | 22.62256662 |
| 1.84E-12 | 22.53843102 |
| 2.76E-12 | 22.09390638 |
| 3.76E-12 | 21.75875144 |
| 4.24E-12 | 21.63519931 |
| 5.22E-12 | 21.40495409 |
| 5.52E-12 | 21.33758623 |
| 1.02E-11 | 20.68666562 |
| 1.57E-11 | 20.2027734  |
| 2.03E-11 | 19.9115966  |
| 3.80E-11 | 19.23477231 |
| 5.52E-11 | 18.83850563 |
| 5.57E-11 | 18.82866762 |
| 6.12E-11 | 18.7210234  |
| 7.40E-11 | 18.51620752 |
| 8.38E-11 | 18.38507996 |
| 1.55E-10 | 17.71397406 |
| 1.61E-10 | 17.6703147  |
| 1.66E-10 | 17.63822902 |
| 1.85E-10 | 17.51985095 |
| 3.11E-10 | 16.9746665  |
| 3.61E-10 | 16.81808631 |
| 5.64E-10 | 16.3267768  |
| 8.30E-10 | 15.90459811 |
| 9.95E-10 | 15.70745354 |
| 1.03E-09 | 15.66952975 |
| 1.27E-09 | 15.45706136 |
| 1.99E-09 | 14.97392675 |
| 2.40E-09 | 14.77570258 |



|             |              |
|-------------|--------------|
| 2.51E-09    | 14.72235057  |
| 5.03E-09    | 13.99059718  |
| 8.02E-09    | 13.48996635  |
| 8.28E-09    | 13.4545844   |
| 8.45E-09    | 13.4316475   |
| 1.16E-08    | 13.0858339   |
| 1.36E-08    | 12.91724324  |
| 1.39E-08    | 12.89243016  |
| 1.79E-08    | 12.61720388  |
| 2.30E-08    | 12.35289093  |
| 2.32E-08    | 12.34423416  |
| 3.18E-08    | 11.9995068   |
| 3.44E-08    | 11.9133938   |
| 3.97E-08    | 11.75623508  |
| 4.53E-08    | 11.61630585  |
| 4.61E-08    | 11.5976605   |
| 5.13E-08    | 11.48475925  |
| 8.51E-08    | 10.9424207   |
| 1.14E-07    | 10.63226765  |
| 1.52E-07    | 10.32629006  |
| 2.13E-07    | 9.970868261  |
| 2.83E-07    | 9.664452894  |
| 4.65E-07    | 9.119751843  |
| 5.66E-07    | 8.908596922  |
| 6.46E-07    | 8.766147473  |
| 1.13E-06    | 8.165852336  |
| 1.33E-06    | 7.986892141  |
| 1.37E-06    | 7.952367166  |
| 1.55E-06    | 7.815788678  |
| 1.61E-06    | 7.780234744  |
| 2.76E-06    | 7.194215012  |
| 4.17E-06    | 6.743252904  |
| 5.43E-06    | 6.453291693  |
| 7.53E-06    | 6.097823104  |
| 1.26E-05    | 5.544328266  |
| 1.31E-05    | 5.506356351  |
| 2.22E-05    | 4.942876631  |
| 2.24E-05    | 4.932660781  |
| 2.66E-05    | 4.744876656  |
| 4.24E-05    | 4.242477051  |
| 5.31E-05    | 4.000519366  |
| 6.29E-05    | 3.810818076  |
| 6.77E-05    | 3.732816792  |
| 9.34E-05    | 3.377537839  |
| 0.000139546 | 2.945228354  |
| 0.000148997 | 2.87570235   |
| 0.000153749 | 2.841666076  |
| 0.000218389 | 2.460337508  |
| 0.000470897 | 1.616688877  |
| 0.000679547 | 1.212215949  |
| 0.001024481 | 0.755798634  |
| 0.001892533 | 0.0725857    |
| 0.005399504 | -1.084122303 |

0.035037875 -3.20217415
